## 1 **Immunological role of primary cilia of dendritic cells in human skin disease**

2 Manami Toriyama<sup>1,2,3,\*</sup>, Defri Rizaldy<sup>1,2,4</sup> Motoki Nakamura<sup>5</sup>, Fumitaka Fujita<sup>1,2,6</sup>, Fumihiro  
3 Okada<sup>1,6</sup>, Akimichi Morita<sup>5</sup>, Ken J. Ishii<sup>2,7,8\*</sup>

4 1. Graduate School of Pharmacological Sciences, Osaka University, Osaka, Japan

5 2. Center for Vaccine and Adjuvant Research (CVAR), National Institutes of Biomedical  
6 Innovation, Health and Nutrition, Osaka, Japan

7 3. Graduate School of Science and Technology, Nara Institute of Science and Technology,  
8 Nara, Japan

9 4. School of Pharmacy, Institut Teknologi Bandung, Indonesia

10 5. Department of Geriatric and Environmental Dermatology, Graduate School of Medical  
11 Sciences, Nagoya City University, Nagoya, Japan

12 6. Mandom Corporation, Osaka, Japan

13 7. Laboratory of Vaccine Science, WPI Immunology Frontier Research Center (IFReC),  
14 Osaka University, Osaka, Japan

15 8. Division of Vaccine Science, The Institute of Medical Science, The University of Tokyo,  
16 Tokyo, Japan

17 \*Corresponding authors

## 18 **Abstract**

19 Primary cilia are a unique organelle, known to provide a signaling hub for variety of cell  
20 activities. Their potential role(s) in human immune homeostasis and diseases, however, have  
21 yet to be explored. Here, we show that human dendritic cells (DCs) express primary cilia-like  
22 structure. The primary cilia growth during DC proliferation by GM-CSF was shut off by DC  
23 maturation agents, suggesting the role of primary cilia to transduce proliferation signaling.  
24 PDGFR $\alpha$  pathway, one of proliferation signal in primary cilia, promoted DC proliferation in a  
25 dependent manner of intra-flagellar transport system. In epidermis with atopic dermatitis  
26 patients, aberrant ciliated langerhans cells and keratinocytes with showing immature state  
27 were observed that may play a potential role in inflammation and skin barrier disorder.

## 28 **Main**

29 Primary cilia are unique organelles protruding into extracellular spaces from a basal  
30 body, and work as a platform for signaling pathways [1]. Intraflagellar transport (IFT) system  
31 is essential for axonome elongation and ciliary protein transport [2]. *IFT* gene mutations or

32 disruption of this transport system eliminate primary cilia, resulting developmental defects,  
33 signaling defects and ciliopathy [3-5]. Primary cilia are formed when cells are in G0 or G1  
34 phase, and their components regulate cell cycle progression [6]. Thus, primary cilium  
35 formation and the cell cycle tightly regulate each other; it is widely thought that primary cilia  
36 regulate cell proliferation and differentiation in many types of cells or tissues. While it has  
37 been well accepted that almost all types of cells can generate primary cilia, whether immune  
38 cells and/or stromal cells in immune organs/tissues express primary cilia and if so, what  
39 would be the precise roles its existence in the immune system and mechanisms of their action  
40 have not been explored until recently. In 2015, Prosser and Morrison reported that  
41 immortalized T and B cells have primary cilia [7]. Furthermore, Ezratty et al., reported that  
42 mouse embryonic epidermal keratinocytes (KC) has primary cilia, regulating KC  
43 differentiation [8].

44 Skin is the biggest tissue, which plays immunologically important roles in its homeostasis  
45 as well as pathological conditions such as infection and injury. Amongst three layers of the  
46 skin; epidermis, dermis, and subcutaneous tissue, KCs are the major cells in epidermis, and its  
47 proliferation and differentiation are strictly regulated to maintain skin homeostasis [9]. KCs  
48 finally form the stratum corneum working as physical barrier against pathogens [10]. Immune  
49 cells, including Langerhans cells (LCs), which have a similar role as dendritic cells (DCs),  
50 also exist in epidermis, and maintain skin homeostasis by working as antigen-presenting cells  
51 to activate T cells [11-13]. It has long been accepted that LCs have a pivotal role in bridging  
52 innate and acquired immunity, which is required for skin homeostasis. On the other hand,  
53 they are involved in the pathology of allergic skin diseases, including atopic dermatitis [14-  
54 16]. Yet, there are very few studies exploring the potential role of primary cilia in LC and/or  
55 other DCs of the skin in relation with the stromal cells such as KCs in either homeostasis or  
56 pathogenesis of skin immunity.

57 The prevalence of atopic dermatitis has increased greatly in the past 30 years, and it is  
58 widely known that environmental factors such as mite antigen in house dust can trigger atopic  
59 disease. In both the early and chronic stages of atopic dermatitis, type 2 immune responses,  
60 which are characterized as the elevation of several type 2 cytokines and IgE production, are  
61 dominant [17]. Chemokines secreted from KCs are upregulated, recruiting Th2 cells which  
62 strongly induce Th2 responses [18]. Atopic dermatitis often features skin barrier disruption,  
63 leading to dryness, itchiness, and invasion by pathogens such as *Staphylococcus aureus*.  
64 Topical steroids, tacrolimus, and moisturizers are use in its treatment, but because of its  
65 complicated pathogenesis, it often recurs after improvement. As such, it is clinically

66 important to regulate inflammation and skin barrier maintenance, targeting both KCs and  
67 immune cells, however, potential roles of primary cilia in the pathogenesis of atopic  
68 dermatitis have not been fully clarified.

69 We therefore hypothesized that there may be potential role of primary cilia in the immune  
70 system in both homeostatic and pathological conditions, and examined whether human  
71 immune cells such dendritic cells express primary cilia, derived from primary blood  
72 monocytes and cell lines in vitro as well as human skin samples of healthy and atopic  
73 dermatitis patients. We further went on analyzing the molecular mechanism(s) by which  
74 expression and/or growth of primary cilia in human immune cells are regulated, and their  
75 physiological relevance in homeostasis and pathological condition of the skin.

## 76 **Results**

### 77 **Human primary immune cells have primary cilium-like structures**

78 To examine the primary cilia expression in human skin, we took healthy human skin  
79 samples and visualized the primary cilia in epidermis and dermis by staining with acetylated  
80 tubulin using fluorescent microscopy. As expected, we found many ciliated cells in dermis,  
81 which suggests that most ciliated cells were fibroblasts (extended data Fig. 1A). We found  
82 primary cilium-like structure in the epidermal basal area where proliferating KC stem cells  
83 are populous. Primary cilia-like structures were also detected in the stratum spinosum, at a  
84 lower frequency than in the basal layer (Fig. 1B). We hypothesized that most of the ciliated  
85 epidermal cells were KCs. However, terminal differentiation of KCs induces programmed cell  
86 death in the granular layer to form the stratum corneum [19]. As loss of cilia induces  
87 apoptosis in HeLa cells [20], we hypothesized that the ciliated cells in the stratum layer were  
88 not KCs but were resident living immune cells. When examining primary cilia in CD4+ T  
89 cells, CD8+ T cells, and Langerhans cells (LCs), we found only LCs in epidermis, positively  
90 merged with acetylated tubulin (Fig. 1B). Of note, most primary cilium-like structures in the  
91 stratum spinosum were not co-localized with langerin-positive cells. We did not determine the  
92 type of cells ciliated in this layer, but we hypothesized that they were KCs just before  
93 apoptosis. Mouse KCs have primary cilia ([8]), so human adult KCs may also be ciliated.

94 LCs are a kind of DC and have a similar function as conventional DCs (cDCs). To see  
95 whether immune cells in blood, especially cDCs, are ciliated, we isolated peripheral blood  
96 mononuclear cells (PBMCs), a mixture of immune cells, from human peripheral blood, and  
97 immunostained them with acetylated or glutamylated tubulin. Nearly 2% of cells had primary

98 cilium-like structures a showing single protrusion stained with stabilized tubulin, extending  
99 from the pericentrin by nearly 1  $\mu\text{m}$  (Fig. 1C). We examined whether the structure was  
100 Arl13B positive. Arl13B is known as primary cilia marker, and is required for cilia formation  
101 and maintenance [21]. Arl13B-GFP was exogenously expressed in PBMCs, then cells were  
102 immunostained with green fluorescent protein (GFP). A GFP signal was observed as a single  
103 linear structure (Fig. 1D) similar to the stabilized tubulin (Fig. 1C). As the formation of  
104 primary cilia is strongly associated with the cell cycle and serum starvation promotes their  
105 elongation in many types of cells by inducing cell cycle arrest [22, 23], we examined whether  
106 human primary immune cells use a similar mechanism to elongate primary cilia. Serum  
107 starvation by culturing in 0.5% serum for 16 h significantly increased the frequency of  
108 primary cilium-like structures, which tended to be longer than those in cells treated in 10%  
109 serum (Fig. 1E, F). For further investigation of primary cilium-like structures in PBMCs in  
110 detail, we used transmission electron microscopy. We observed the vesicle–centrosome  
111 interaction, which resembles a ciliary vesicle (Fig. 1G). Also, centrosome elongation  
112 resembling axoneme extension, which is found in early primary cilium elongation, was  
113 clearly observed (Fig. 1G). These results raise the strong possibility that human immune cells  
114 are ciliated, and have similar machinery to elongate primary cilia.

115 To identify specific types of ciliated immune cells, we isolated monocytes, cDCs,  
116 plasmacytoid dendritic cells (pDCs), CD4 T cells, CD8 T cells, natural killer cells, and B cells  
117 from human PBMCs by flow cytometry and immunostained them with acetylated tubulin.  
118 Except for CD8 T cells, all other cells had primary cilium-like structures resembling that in  
119 Figure 1C (Fig. 1G, Supp. Table 1). cDCs had the highest rate, so we focused on the function  
120 of primary cilia in DCs. The frequency of ciliated primary DCs isolated from PBMCs was  
121 comparable to that of LCs in epidermis (Fig. 4D, Supp. Table 1). In summary, these results  
122 suggest the presence of primary cilia in DCs and LCs. We next sought the function of primary  
123 cilia in these cells.

#### 124 **DC maturation decreases primary cilia**

125 DCs can be differentiated from monocytes *in vitro* [24]. To analyze whether monocyte-  
126 derived DCs are ciliated *in vitro*, we isolated CD14<sup>+</sup> monocytes from human PBMCs and  
127 cultured them for 7 days with stimulation with GM-CSF, IL-4 and TNF $\alpha$  to differentiate into  
128 mature DCs. When we looked at primary cilia in them, the frequency of primary cilia was  
129 significantly decreased as day passed (Fig. 2A). To analyze whether DC maturation decreases  
130 primary cilium formation, we stimulated primary DCs with TNF $\alpha$  or PGE2 for 24 h. TNF $\alpha$

131 significantly decreased primary cilium formation dose-dependently (Fig. 2B). PGE2  
132 stimulation had a similar effect (Fig. 2C), which suggests that DC maturation decreased  
133 primary cilium formation.

134 We also induced immature DCs by culturing with GM-CSF and IL-4. In immature DCs  
135 at day 7, nearly 1% of cells were ciliated, similar to the proportion in primary DCs (Fig. 2D,  
136 Supp. Table 1). The percentage did not differ significantly from day 1 to day 7 (Fig. 2D).  
137 Most DCs in healthy blood are immature, so these results suggest that immature DCs derived  
138 from CD14+ monocytes *in vitro* are similar to primary DCs, and raise the possibility that  
139 primary cilium formation was inhibited while monocytes differentiated into mature DCs.

140 Next, we investigated whether IL-4 or GM-CSF promoted primary cilium formation,  
141 because the frequency of primary cilia in immature DCs was a little higher than that in  
142 untreated (day 0) monocytes (Fig. 2D). GM-CSF significantly promoted primary cilium  
143 formation (Fig. 2E). Interestingly, IL-4 did not increase it, whereas IL-4 was simultaneously  
144 added with GM-CSF. It is widely known that cell maturation and cell proliferation show  
145 inverse behaviors. Immature or precursor cells proliferate much more than mature cells. To  
146 investigate the effect of GM-CSF and IL-4 on cell proliferation, we cultured immature DCs  
147 with GM-CSF or IL-4 and analyzed cell growth by MTT assay. GM-CSF increased DC  
148 proliferation, but IL-4 did not. Co-treatment with IL-4 canceled the effect of GM-CSF (Fig.  
149 2F). These findings raise an interesting possibility that primary cilium formation is correlated  
150 with DC proliferation, making GM-CSF a candidate to promote primary cilium formation.

151 Having demonstrated that GM-CSF promoted primary cilium formation and cell  
152 proliferation, we evaluated which cells secrete GM-CSF. We stimulated CD14+ monocytes to  
153 differentiate into immature and mature LCs, then compared GM-CSF expression between  
154 those and human immortalized KCs (HaCaTs). Immature LCs expressed GM-CSF much  
155 more than mature LCs and HaCaTs did (Fig. 2G). Immature LCs spontaneously expressed  
156 GM-CSF without any stimulation, and stimulation did not alter its expression (Fig. 2G). IL-4  
157 was not detected in LCs, but HaCaTs spontaneously expressed it (extended data Fig. 2).  
158 These results suggest that immature LCs in epidermis are the main producers of GM-CSF.

### 159 **Df promotes primary cilium formation.**

160 As GM-CSF promoted ciliogenesis and proliferation, we next focused on  
161 immunostimulants that promote GM-CSF secretion. GM-CSF is a Th2 cytokine, and its  
162 expression is elevated in atopic dermatitis [25], which can be triggered by house dust mite  
163 antigen. Therefore, we tested the effect of mite antigen on ciliogenesis. We also tested LPS,

164 which activates TLR4 and induces strong Th1 immune responses in human immature DCs.  
165 We stimulated primary DCs with LPS, and mite antigen derived from *Dermatophagoides*  
166 *farinae* (*Df*). *Df* antigen slightly (but not significantly) increased the population of ciliated  
167 DCs (Fig. 3A). In contrast, LPS significantly decreased primary cilia (extended data Fig. 4A).  
168 We next analyzed how these immunostimulants stimulate cell proliferation activity. Contrary  
169 to expectation, LPS and *Df* treatment did not affect proliferation activity in DCs (Fig. 3B,  
170 extended data Fig. 3B).

171 KCs showed different responses to immunostimulants from DCs. LPS stimulation  
172 decreased KC proliferation while *Df* significantly increased it (extended data Fig. 3C). Ki67  
173 expression in HaCaTs was increased as expected after stimulation with *Df* (extended data Fig.  
174 3D). The differences in cell responses between primary DCs and HaCaTs are not surprising,  
175 but we hypothesized that *Df* is one of the important molecule to regulate DCs and LCs  
176 functions.

### 177 **PDGFR $\alpha$ signaling promotes DC proliferation**

178 PDGFR $\alpha$  is highly localized in primary cilia [26]. PDGF-A, a specific ligand for PDGFR $\alpha$ ,  
179 promotes fibroblast and KC proliferation during wound healing of skin [9]. We identified  
180 PDGFR $\alpha$  expression in primary DCs and HaCaTs (extended data Figs. 3D, 4B, 4D). To  
181 identify the type of cells secreting PDGF-A, we performed ELISA assay with culture  
182 supernatant of immature LCs, mature LCs, and HaCaTs. HaCaTs spontaneously expressed  
183 PDGF-A, but LCs did not. These results strongly suggest that KCs have a major role in  
184 secreting PDGF-A (extended data Fig. 4A).

185 Next we analyzed the function of PDGFR $\alpha$  signaling on proliferation in primary DCs and  
186 KCs. Co-treatment of DCs or KCs with PDGF-AA and GM-CSF significantly increased  
187 proliferation (Fig. 3C, extended data Fig. 4C, 4D). PDGFR $\alpha$  expression was not changed  
188 when cells were stimulated with PDGF-AA, GM-CSF, LPS and *Df* (extended data Fig. 3D,  
189 4B, 4D). To investigate whether disruption of primary cilia causes DC maturation, we  
190 performed a knockdown experiment using siRNA targeting *IFT88*. Knockdown of *IFT88*  
191 increased the CD86 and CCR7 expression in THP1-derived immature DCs (Fig. 3D).  
192 Furthermore, ki67 expression was downregulated with *IFT88* knockdown (Fig. 3E).  
193 Interestingly, knockdown of *IFT88* canceled proliferation promoted by co-stimulation with  
194 PDGF-AA and GM-CSF (Fig. 3F). These results suggest an important role of the PDGFR $\alpha$   
195 signaling pathway through primary cilia in DC proliferation.

### 196 **Primary cilia are increased in epidermis with atopic dermatitis**



197 LCs proliferate extensively in epidermis with atopic dermatitis ([27], Fig. 4A). To  
198 address whether atopic condition alters primary cilium formation, we investigated the  
199 frequency of primary cilia in human epidermis with atopic dermatitis. Compared with healthy  
200 skin, the number of primary cilia was greatly increased especially in the basal area (Fig. 4B,  
201 D). Interestingly, ciliated cells other than LCs were often detected in atopic dermatitis (Fig.  
202 4B,C). The frequency of ciliated cells (all types) and of ciliated LCs in atopic LCs was  
203 increased (Fig. 4D). We did not determine ciliated cell type other than LC, but we speculated  
204 they were KC because majority of epidermal cells are KC.

205 We also investigated the number of proliferating cells in atopic epidermis. Ki67 is a  
206 proliferation marker, and its expression is highly increased in S and M phases. In atopic  
207 dermatitis, ki67 positive LC is increased [27], and we found similar results. Ki67-positive  
208 epidermal cells were significantly increased in atopic epidermis (Fig. 4E). Unexpectedly,  
209 some ciliated cells were positively stained for ki67 in atopic epidermis, but none were  
210 positive in healthy skin samples (Fig. 4F). Primary cilia are generally formed in G0 or G1  
211 phase, and their formation is repressed in proliferating cells in G2/M phase ([6]). We did not  
212 determine the specific cell cycle phase that cells were in, but strong expression of ki67 in  
213 atopic epidermis suggests that ki67 positive atopic epidermal cells were in S or G2/M phase.  
214 It is widely accepted that proliferation and maturation are highly correlated, so we next  
215 investigated an LC maturation marker, CCR7, in epidermis. In healthy epidermis, nearly 35%  
216 of LCs were positively stained with CCR7, but atopic LCs were not (Fig. 4G). This result  
217 strongly indicates that atopic LCs are immature.

218 We also explored the expression of KC maturation markers. In healthy epidermis, K14, a  
219 marker of immature KCs, was highly expressed near the basal layer, and K10, a marker of  
220 mature KCs, was highly expressed only in the stratum granulosum (Fig. 5A). In atopic  
221 epidermis, in contrast, K14 was highly expressed in the basal layer and moderately expressed  
222 throughout the stratum spinosum and stratum granulosum (Fig. 5B). Interestingly, K10 was  
223 strongly expressed even in the stratum spinosum, along with K14 (Fig. 5B). We next  
224 investigated other markers of differentiation, loricrin and filaggrin. These proteins are  
225 necessary for skin barrier formation, and both are decreased in more than 20% of patients. It  
226 is widely accepted that barrier disruption increases the risk of atopic dermatitis [28-30]. The  
227 percentage of ciliated cells was significantly increased in patients with low levels of loricrin,  
228 but was not correlated with filaggrin expression (Fig. 5C, extended data Fig. 5). Interestingly,  
229 examining the correlation between IgE level and Loricrin expression, as well IgE level and  
230 primary cilia did not have significant differences (Fig. 5D, E). These results suggest the

231 physiological importance of primary cilia in KCs to maintain adequate loricrin expression and  
232 skin barrier formation, which develops but not exacerbate atopic dermatitis. In summary,  
233 immunostaining results strongly suggested excessive proliferation and abnormal primary  
234 cilium formation in atopic dermatitis, which in turn caused hyperproliferation and sustenance  
235 of immature LCs and KCs in atopic dermatitis.

### 236 **Immature Langerhans cells secrete chemokines**

237 Our findings show that ciliated DCs and LCs were immature and highly proliferative *in*  
238 *vitro* and in atopic dermatitis. We next sought the physiological function of immature LCs.  
239 Th2 T cells highly infiltrate atopic epidermis and secrete Th2 cytokines [18]. Thus, we asked  
240 whether immature LCs secrete chemokines to recruit Th2 T cells. To answer this, we  
241 analyzed chemokine expression. MCP1 was highly secreted by immature LCs relative to  
242 mature LCs and KCs (extended data Fig. 6A). In contrast, TARC/CCR17 was expressed by  
243 mature LCs, but not so much by immature LCs or KCs (extended data Fig. 6B). MDC was  
244 highly expressed in both immature and mature LCs but was not detected in KCs (extended  
245 data Fig. 6C). These data suggest the important role of LCs but not KCs in secreting  
246 chemokines to recruit Th2 cells. In atopic dermatitis, immature LCs were highly increased  
247 (Fig. 4G). Our results raise the strong possibility that immature LCs are the main releasers of  
248 Th2 chemokines in atopic dermatitis, which exacerbate disease.

### 249 **Discussion**

250 We identified primary cilia in human epidermis and immune cells from blood (Fig. 1).  
251 Primary cilium formation in epidermis was highly promoted in atopic dermatitis (Fig. 4).  
252 High correlation of primary cilium formation and proliferation suggests a primary function of  
253 cilia in epidermal cell proliferation in atopic dermatitis. In atopic epidermis, ki67-positive  
254 ciliated cells were greatly increased. Primary cilium formation is basically inhibited in G2/M  
255 and S phase, and this phenotype was not found in healthy epidermis, so the cell cycle and  
256 proliferation may be disrupted in atopic dermatitis which maybe a cause of disease. Our data  
257 suggested that GM-CSF promotes primary cilium formation, and PDGFR $\alpha$  signaling via  
258 primary cilia promotes proliferation of DCs (Figs. 2-4). The candidate of atopic dermatitis  
259 inducer, Df, induced primary cilia formation in DCs and proliferation in KCs. Because KCs  
260 produce PDGF-AA constantly, Df may induce thickening of epidermis, which strongly  
261 induces LC proliferation. We have not identified what induces atopic dermatitis, however, we  
262 propose that GM-CSF and Df are strong candidates to develop atopic dermatitis by regulating



263 primary cilia formation and proliferation. Interestingly, ciliopathy patients in several  
264 pedigrees show frequent atopic dermatitis or asthma along with other phenotypes caused by  
265 primary cilium defect [31, 32]. We have not identified genetic alteration of cilium-related  
266 genes in atopic dermatitis patients, so further experiments will be required.

267 Interestingly, the purchased HaCaTs and primary KCs were not ciliated *in vitro*, although  
268 epidermal KCs in tissue were (data not shown; Figs. 1, 4). Because of this technical difficulty,  
269 we could not study the function of primary cilia in KCs in detail. The differences between  
270 epidermal KCs and isolated KCs are unknown, but 3D cell-cell interaction or environmental  
271 factors in tissue may be involved in primary cilium formation. Further investigation is  
272 required to explain the function of primary cilia in KCs.

273 Proliferation and maturation are highly inversely correlated with each other. Therefore,  
274 we asked whether inhibition of proliferation by disrupting primary cilia promoted maturation.  
275 We demonstrated that knockdown of *IFT88* in THP1-derived DCs promoted maturation by  
276 attenuating proliferation activity promoted by PDGFR $\alpha$  signaling (Fig. 3D, E). These results  
277 raise a strong possibility that PDGFR $\alpha$  signaling in primary cilia regulates cell proliferation  
278 and inhibits maturation. We tried to identify the expression of PDGFR $\alpha$  in both healthy and  
279 atopic epidermis, but the experiment did not work (data not shown). Furthermore, we could  
280 not detect the PDGFR $\alpha$  localization in primary cilia in LCs and DCs, even though these cells  
281 expressed PDGFR $\alpha$  detected by western blotting (extended data Figs. 4, 5). Interestingly, we  
282 found constitutive expression of PDGF-AA in HaCaTs (extended data Fig. 5A). This result  
283 raises a possibility that PDGF-AA expression is higher in atopic skin because the number of  
284 KCs is obviously increased. The relationship between pathophysiology and PDGF-AA  
285 expression will be the next topic of research. Imatinib, a PDGFR $\alpha$  antagonist, treats asthma  
286 by decreasing mast cell activation in patients and by decreasing MCP1 expression in mice  
287 [33, 34]. Its effectiveness in the treatment of atopic dermatitis has not been elucidated, but  
288 these reports suggest the importance of PDGFR $\alpha$  signaling in allergic disorders. Furthermore,  
289 methotrexate, a folate antagonist, successfully treated atopic dermatitis [35, 36]. Previously  
290 we demonstrated that folate metabolic pathway is required for primary cilium formation [37].  
291 These knowledge support our idea that the regulation of primary cilia or PDGFR $\alpha$  signaling  
292 could help in the treatment of atopic dermatitis.

293 On the basis of our novel findings, we propose that primary cilia in LCs or in KCs have  
294 an important role in skin homeostasis by regulating proliferation, and excess cilium formation  
295 may cause atopic dermatitis. Over-formation of primary cilia in KCs sustains immaturity,  
296 impairing barrier function by reducing loricrin expression. Ciliated immature LCs strongly

297 recognize antigens or immunostimulants that pass through the skin barrier, and LCs secrete  
298 GM-CSF. GM-CSF promotes primary cilium formation in both KCs and LCs, and  
299 proliferation signals, including PDGFR $\alpha$ , are transduced more strongly. Chemokines secreted  
300 from immature LCs strongly recruit Th2 T cells, which causes a vicious cycle of atopic  
301 dermatitis (extended data Fig. 6D).

## 302 **Methods**

### 303 **Human skin samples**

#### 304 *Isolation of primary DCs and CD14<sup>+</sup> monocytes*

305 Samples of human whole peripheral blood were purchased from the Japanese Red Cross  
306 Society according to the *Guidelines on the Use of Donated Blood in R&D, etc.* Blood from 89  
307 healthy donors was drawn into a heparinized syringe and diluted with an equal volume of  
308 phosphate-buffered saline (PBS). A 35-mL volume of diluted blood was layered over 15 mL  
309 of Ficoll-Paque Plus density gradient medium (GE Healthcare) in Leucosep 50-mL tubes  
310 (Greiner Bio-One), then centrifuged at 500 $\times$  *g* for 20 min at room temperature without  
311 braking. The PBMC fraction was carefully collected by pipetting, and the cells were washed  
312 with RPMI1640 supplemented with 10% fetal bovine serum (FBS). After centrifugation at  
313 500 $\times$  *g* for 10 min at room temperature, red blood cells were lysed with Ammonium-  
314 Chloride-Potassium (ACK) buffer (150 mM NH<sub>4</sub>Cl 10 mM KHCO<sub>3</sub>, 0.1 mM EDTA in PBS)  
315 in a conical tube at room temperature for 10 min. After washing with RPMI1640 containing  
316 10% FBS, CD14-positive monocytes were isolated by CD14 microbeads, human (130-050-  
317 201, Miltenyi Biotec). The positive fraction was used as CD14-positive monocytes. DCs were  
318 isolated with a Blood Dendritic Cell Isolation Kit II, human (130-091-379, Miltenyi Biotec),  
319 from the negative fraction of the CD14-positive fraction.

#### 320 *Cell culture*

321 HaCaT cells were cultured in Dulbecco's modified Eagle's medium (DMEM) supplemented  
322 with 10% FBS, 1% penicillin and 1% streptomycin. Immature and mature LCs were induced  
323 to differentiate from CD14-positive monocytes derived from human primary PBMCs. To  
324 induce immature LCs, CD14-positive monocytes were cultured in RPMI1640 supplemented  
325 with 10 ng/mL IL-4 (100-09, Shenandoah), 100 ng/mL GM-CSF (100-08, Shenandoah), and  
326 10 ng/mL TGF $\beta$  (240-B, R&D Systems). To induce mature LCs, CD14-positive monocytes  
327 were cultured in RPMI1640 supplemented with 10 ng/mL IL-4, 100 ng/mL GM-CSF, 10  
328 ng/mL TGF $\beta$ , and 20 ng/mL TNF $\alpha$  (MAN0003622, Gibco). A half volume of fresh medium

329 was added every 2 days.

### 330 *Isolation of monocytes, pDCs, and cDCs by flow cytometry*

331 Human PBMCs were labeled with Alexa 647 anti-human CD11c (301620, clone 3.9,  
332 BioLegend), anti-human HLA-DR (Class III) PE-Texas conjugate (MHLDR17, Life  
333 Technology), BV421 anti-human CD14 (325627, clone HCD14, BioLegend), PE-Cy7 anti-  
334 human CD123 (560826, clone 7G3, BD Biosciences), APC-Fire 750 anti-human CD8a  
335 (301065, clone RPA-T8, BioLegend), APC-Fire 750 anti-human CD20 (302357, clone 2H7,  
336 BioLegend), and APC-H7 anti-human CD3 (560275, clone SK7, BD Pharmingen) in a  
337 Live/Dead Fixable Aqua Dead Cell Stain Kit (L34966, Invitrogen). Labeled cells were  
338 analyzed and isolated using BD FACSAria II (BD Biosciences). HLA-DR<sup>high</sup>-CD14<sup>low</sup> cells  
339 were gated from a CD3-, CD8-, CD20-negative live-cell population and identified as the DC  
340 population. CD123<sup>middle</sup>-CD11c<sup>high</sup> cells in the DC population were determined as cDCs.  
341 CD123<sup>high</sup>-CD11c<sup>low</sup> cells in the DC population were determined as pDCs. CD14<sup>high</sup>-HLA-  
342 DR<sup>high</sup>-CD11c<sup>high</sup>-CD123<sup>middle</sup> cells were determined as monocytes.

### 343 *ELISA*

344 In 48-well plates,  $2.0 \times 10^5$  HaCaT cells were stimulated with 100  $\mu$ L of DMEM  
345 supplemented with 0.5% FBS. In 96-well plates,  $2.0 \times 10^4$  LCs were stimulated with 100  $\mu$ L  
346 of RPMI1640 supplemented with 0.5% FBS. After 24 h stimulation, 0.5% Triton X-100 was  
347 added into the cell cultures and then cell lysate was collected with supernatant. Cell lysate  
348 was used for ELISA assay following the kit protocol. ELISA kits (CCL17, DY364, MCP1,  
349 DCP00, MDC, DMD00, IL-4, D4050, GM-CSF, DY215) were purchased from R&D  
350 Systems. PDGF-AA ELISA kits (EHPDGF) were purchased from Thermo Fisher Scientific.  
351 Absorbance (excitation, 450 nm) was measured on a microplate reader (Infinite F200 Pro,  
352 Tecan). As reference, background absorbance was measured at 560 nm.

### 353 *Immunostaining*

354 Paraffin-embedded human skin tissue was deparaffinized in xylene 2 times for 10 min each.  
355 The samples were then immersed in 100% ethanol, 95% ethanol, and 2 lots of deionized  
356 water for 10 min each. After rehydration, antigens were retrieved: The samples were  
357 immersed in 1 mM EDTA in deionized water and boiled by microwave for 15 min. They  
358 were then incubated with blocking buffer (10% FBS, 0.1% Triton X-100 in PBS) at room  
359 temperature for 1 h. First antibodies (listed below) were diluted 1:1000 in PBS for the  
360 detection of acetylated tubulin, langerin, and ki67. CCR7 antibody was diluted 1:100 and  
361 incubated at 4 °C overnight. After 3 washes in wash buffer (0.1% Tween-20 in PBS), second

362 antibodies (Alexa 488-conjugated IgG, Alexa 594-conjugated IgG) containing 1/5000  
363 Hoechst 33342 (Thermo Fisher Scientific) were reacted at room temperature for 2 h. After  
364 rinsing in wash buffer, samples were mounted with ProLong Gold antifade reagent (Thermo  
365 Fisher Scientific). For single-cell immunostaining following the blocking step, cells were  
366 mounted on MAS-coated slide glass (Matsunami). First antibodies comprised anti-acetylated  
367  $\alpha$ -tubulin (T7451, clone 6-11B-1, Sigma), anti-langerin (ab192027, clone EPR15863,  
368 Abcam), anti-ki67 (#9449, clone 8D5, Cell Signaling Technology; ab16667, clone SP6,  
369 Abcam), anti-CCR7 (MAB197, clone 150503, R&D Systems), anti-pericentrin (A301-348A,  
370 Bethyl), and anti-GFP (SC-9996, clone B-2, Santa Cruz Biotechnology) antibodies.

371 The number of ciliated cells was counted and statistically analyzed in Prism 7 software.

### 372 ***Proliferation assay***

373 In 96-well plates, 3000 HaCaT cells or 5000 primary DCs were stimulated with reagent in  
374 100  $\mu$ L of medium containing 0.5% FBS and 10  $\mu$ L of CCK-8 buffer (Cell Counting Kit-8,  
375 Dojindo). After 24 h, absorbance at 450 nm was measured on a microplate reader (Infinite  
376 F200 Pro). As reference, background absorbance was measured at 560 nm.

### 377 ***Electron microscopy***

378 Cells were fixed with 2% glutaraldehyde in 0.1 M phosphate buffer (PB), pH 7.4, at 4 °C  
379 overnight. The fixed samples were washed 3 times with 0.1 M PB for 30 min each, and were  
380 post-fixed with 2% OsO<sub>4</sub> in 0.1 M PB at 4 °C for 1 h. They were then dehydrated in a graded  
381 ethanol solution at 50% and 70% for 5 min each at 4 °C, 90% for 5 min at room temperature,  
382 and 3 changes of 100% for 5 min each at room temperature. The samples were infiltrated with  
383 propylene oxide (PO) 2 times for 5 min each, put into a 70:30 mixture of PO and resin  
384 (Quetol-812; Nisshin EM Co.) for 10 min, and then exposed to the open air overnight for the  
385 PO to volatilize. The samples were transferred to fresh 100% resin and polymerized at 60 °C  
386 for 48 h. The polymerized resins were ultrathin-sectioned at 70 nm with a diamond knife on  
387 an ultramicrotome (Ultracut UCT; Leica), and the sections were mounted on copper grids.  
388 They were stained with 2% uranyl acetate at room temperature for 15 min, washed with  
389 distilled water, and then secondary-stained with lead stain solution (Sigma-Aldrich) at room  
390 temperature for 3 min. The grids were observed by transmission electron microscope (JEM-  
391 1400 Plus; JEOL Ltd.) at an acceleration voltage of 100 kV. Digital images (3296  $\times$  2472  
392 pixels) were taken with a CCD camera (EM-14830RUBY2; JEOL Ltd.).

393 Reference mendeley

394

## 395 References

- 396 1. Goetz, S.C. and K.V. Anderson, *The primary cilium: a signalling centre during*  
397 *vertebrate development*. Nat Rev Genet, 2010. **11**(5): p. 331-44.
- 398 2. Pedersen, L.B. and J.L. Rosenbaum, *Intraflagellar transport (IFT) role in ciliary*  
399 *assembly, resorption and signalling*. Curr Top Dev Biol, 2008. **85**: p. 23-61.
- 400 3. Fliegauf, M., T. Benzing, and H. Omran, *When cilia go bad: cilia defects and*  
401 *ciliopathies*. Nat Rev Mol Cell Biol, 2007. **8**(11): p. 880-93.
- 402 4. Valente, E.M., et al., *Primary cilia in neurodevelopmental disorders*. Nat Rev Neurol,  
403 2014. **10**(1): p. 27-36.
- 404 5. Nigg, E.A. and J.W. Raff, *Centrioles, centrosomes, and cilia in health and disease*.  
405 Cell, 2009. **139**(4): p. 663-78.
- 406 6. Goto, H., A. Inoko, and M. Inagaki, *Cell cycle progression by the repression of*  
407 *primary cilia formation in proliferating cells*. Cell Mol Life Sci, 2013. **70**(20): p.  
408 3893-905.
- 409 7. Prosser, S.L. and C.G. Morrison, *Centrin2 regulates CP110 removal in primary cilium*  
410 *formation*. J Cell Biol, 2015. **208**(6): p. 693-701.
- 411 8. Ezratty, E.J., et al., *A role for the primary cilium in Notch signaling and epidermal*  
412 *differentiation during skin development*. Cell, 2011. **145**(7): p. 1129-41.
- 413 9. Barrientos, S., et al., *Growth factors and cytokines in wound healing*. Wound Repair  
414 Regen, 2008. **16**(5): p. 585-601.
- 415 10. Madison, K.C., *Barrier function of the skin: "la raison d'etre" of the epidermis*. J  
416 Invest Dermatol, 2003. **121**(2): p. 231-41.
- 417 11. Pasparakis, M., I. Haase, and F.O. Nestle, *Mechanisms regulating skin immunity and*  
418 *inflammation*. Nat Rev Immunol, 2014. **14**(5): p. 289-301.
- 419 12. Nestle, F.O., et al., *Skin immune sentinels in health and disease*. Nat Rev Immunol,  
420 2009. **9**(10): p. 679-91.
- 421 13. Deckers, J., H. Hammad, and E. Hoste, *Langerhans Cells: Sensing the Environment in*  
422 *Health and Disease*. Front Immunol, 2018. **9**: p. 93.
- 423 14. Callard, R.E. and J.I. Harper, *The skin barrier, atopic dermatitis and allergy: a role for*  
424 *Langerhans cells?* Trends Immunol, 2007. **28**(7): p. 294-8.
- 425 15. Dubrac, S., M. Schmuth, and S. Ebner, *Atopic dermatitis: the role of Langerhans cells*  
426 *in disease pathogenesis*. Immunol Cell Biol, 2010. **88**(4): p. 400-9.
- 427 16. Nakajima, S., et al., *Langerhans cells are critical in epicutaneous sensitization with*  
428 *protein antigen via thymic stromal lymphopoietin receptor signaling*. J Allergy Clin  
429 Immunol, 2012. **129**(4): p. 1048-55 e6.
- 430 17. Gandhi, N.A., et al., *Targeting key proximal drivers of type 2 inflammation in disease*.  
431 Nat Rev Drug Discov, 2016. **15**(1): p. 35-50.
- 432 18. Nedoszytko, B., et al., *Chemokines and cytokines network in the pathogenesis of the*  
433 *inflammatory skin diseases: atopic dermatitis, psoriasis and skin mastocytosis*.  
434 Postepy Dermatol Alergol, 2014. **31**(2): p. 84-91.
- 435 19. Eckhart, L., et al., *Cell death by cornification*. Biochim Biophys Acta, 2013. **1833**(12):  
436 p. 3471-3480.
- 437 20. Kim, J.C., et al., *The Bardet-Biedl protein BBS4 targets cargo to the pericentriolar*  
438 *region and is required for microtubule anchoring and cell cycle progression*. Nat  
439 Genet, 2004. **36**(5): p. 462-70.
- 440 21. Larkins, C.E., et al., *Arl13b regulates ciliogenesis and the dynamic localization of Shh*  
441 *signaling proteins*. Mol Biol Cell, 2011. **22**(23): p. 4694-703.
- 442 22. Tang, Z., et al., *Autophagy promotes primary ciliogenesis by removing OFD1 from*  
443 *centriolar satellites*. Nature, 2013. **502**(7470): p. 254-7.



- 444 23. Orhon, I., et al., *Autophagy and regulation of cilia function and assembly*. Cell Death  
445 Differ, 2015. **22**(3): p. 389-97.
- 446 24. Nair, S., G.E. Archer, and T.F. Tedder, *Isolation and generation of human dendritic*  
447 *cells*. Curr Protoc Immunol, 2012. **Chapter 7**: p. Unit7 32.
- 448 25. Pastore, S., et al., *Granulocyte macrophage colony-stimulating factor is overproduced*  
449 *by keratinocytes in atopic dermatitis. Implications for sustained dendritic cell*  
450 *activation in the skin*. J Clin Invest, 1997. **99**(12): p. 3009-17.
- 451 26. Schneider, L., et al., *PDGFRalpha signaling is regulated through the primary*  
452 *cilium in fibroblasts*. Curr Biol, 2005. **15**(20): p. 1861-6.
- 453 27. Chorro, L., et al., *Langerhans cell (LC) proliferation mediates neonatal development,*  
454 *homeostasis, and inflammation-associated expansion of the epidermal LC network*. J  
455 Exp Med, 2009. **206**(13): p. 3089-100.
- 456 28. Palmer, C.N., et al., *Common loss-of-function variants of the epidermal barrier*  
457 *protein filaggrin are a major predisposing factor for atopic dermatitis*. Nat Genet,  
458 2006. **38**(4): p. 441-6.
- 459 29. O'Regan, G.M., et al., *Filaggrin in atopic dermatitis*. J Allergy Clin Immunol, 2008.  
460 **122**(4): p. 689-693.
- 461 30. Kim, B.E., et al., *Loricrin and involucrin expression is down-regulated by Th2*  
462 *cytokines through STAT-6*. Clin Immunol, 2008. **126**(3): p. 332-7.
- 463 31. Aldahmesh, M.A., et al., *IFT27, encoding a small GTPase component of IFT particles,*  
464 *is mutated in a consanguineous family with Bardet-Biedl syndrome*. Hum Mol Genet,  
465 2014. **23**(12): p. 3307-15.
- 466 32. Moore, S.J., et al., *Clinical and genetic epidemiology of Bardet-Biedl syndrome in*  
467 *Newfoundland: a 22-year prospective, population-based, cohort study*. Am J Med  
468 Genet A, 2005. **132A**(4): p. 352-60.
- 469 33. Cahill, K.N., et al., *KIT Inhibition by Imatinib in Patients with Severe Refractory*  
470 *Asthma*. N Engl J Med, 2017. **376**(20): p. 1911-1920.
- 471 34. Berlin, A.A. and N.W. Lukacs, *Treatment of cockroach allergen asthma model with*  
472 *imatinib attenuates airway responses*. Am J Respir Crit Care Med, 2005. **171**(1): p.  
473 35-9.
- 474 35. Shaffrali, F.C., et al., *Experience with low-dose methotrexate for the treatment of*  
475 *eczema in the elderly*. J Am Acad Dermatol, 2003. **48**(3): p. 417-9.
- 476 36. Zoller, L., M. Ramon, and R. Bergman, *Low dose methotrexate therapy is effective in*  
477 *late-onset atopic dermatitis and idiopathic eczema*. Isr Med Assoc J, 2008. **10**(6): p.  
478 413-4.
- 479 37. Toriyama, M., et al., *Folate-dependent methylation of septins governs ciliogenesis*  
480 *during neural tube closure*. FASEB J, 2017. **31**(8): p. 3622-3635.
- 481

## 482 **Acknowledgments**

483 The authors thank the Japanese Red Cross Society for supplying blood samples under the  
484 *Guidelines on the Use of Donated Blood in R&D, etc*. This work was supported in part by  
485 JSPS KAKENHI grant JP 19K17797 (to M.T.). The authors declare no conflicts of interest.

## 486 **Author contributions**

487 M.T. and K.J.I. conceived and designed the experiments and wrote the manuscript; M.T.,



488 D.R., and M.N. conducted the experiments; and F.F., F.O., and A. Morita contributed to the  
489 writing and editing of the manuscript.

# Figure 1. Human primary immune cells have primary cilia-like structure

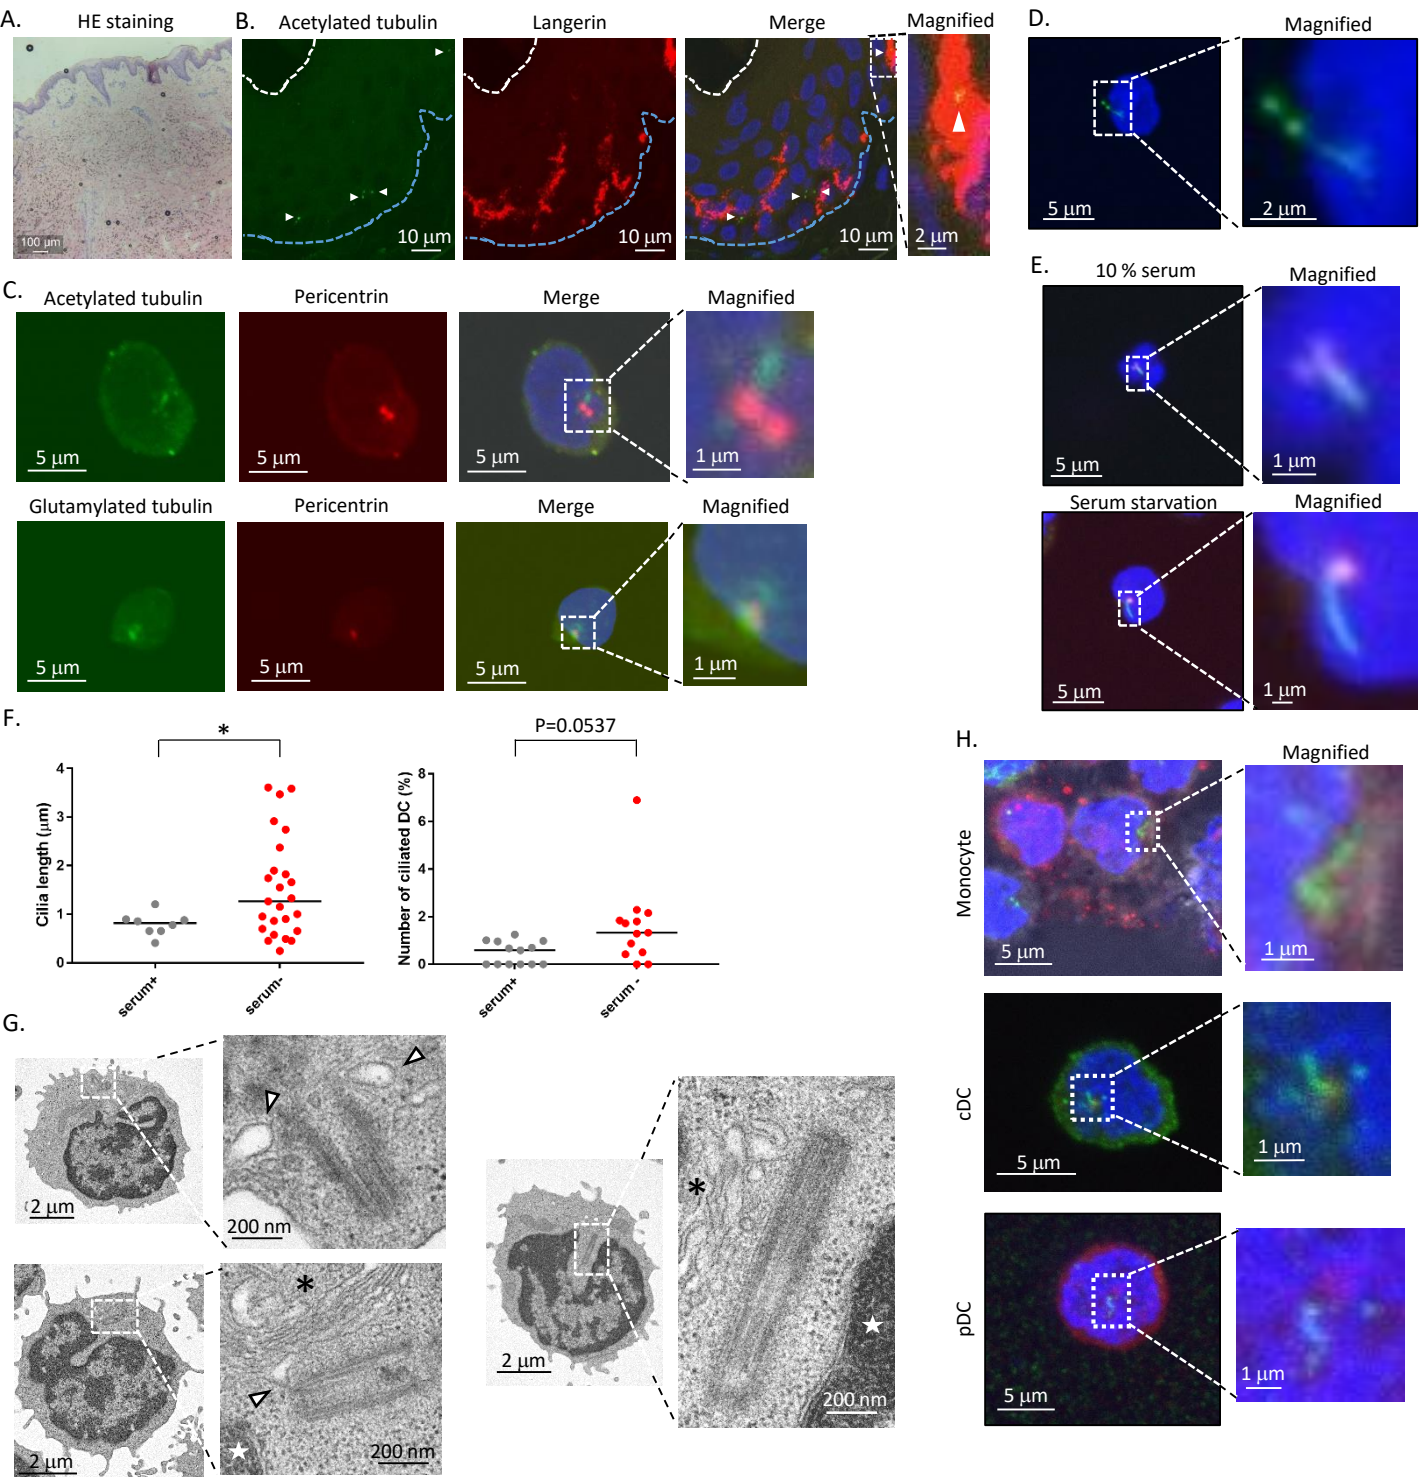

## Figure 1. Human Primary immune cells have primary cilia-like structure.

(A) HE staining of healthy human skin. (B) Langerin-positive langerhans cells and acetylated tubulin (primary cilia marker) in human healthy epidermis. Arrowhead indicates primary cilia-like structure. Blue dot line indicates epidermal basal layer. White dot line indicates stratum corneum. Dot box indicates magnified area shown in right. (C) Immunostaining image of human PBMC stained with acetylated tubulin or glutamylated tubulin. Dot box indicates magnified area shown in right. (D) Immunostaining image of human PBMC expressing Arl13B-GFP. Cells were electroporated with Arl13B-GFP expression plasmid, then immunostained by using anti GFP antibody. Dot box area was magnified. (E) Human PBMC was cultured in media supplemented with 10% FBS (serum +) or 0.5% FBS (Serum -) for 16 hrs, then immunostained with acetylated tubulin (Green), and pericentrin (Red). Dot box area were magnified. (F) Number of ciliated cells or cilia length shown in (E). Bar indicates median. \* $P < 0.05$ . (Mann-Whitney U test). (G) Electron microscope image of primary cilia-like structure. Arrow head indicates ciliary vesicle like structure. Asterisk indicates goldi apparatus. Star indicates nucleus. Dot box indicates magnified area shown in right. (H) Monocyte, pDC and cDC were isolated from PBMC using flow cytometry, then isolated cells were immunostained with acetylated tubulin (green), and pericentrin (red).

## Figure 2. DC maturation decreases primary cilia.

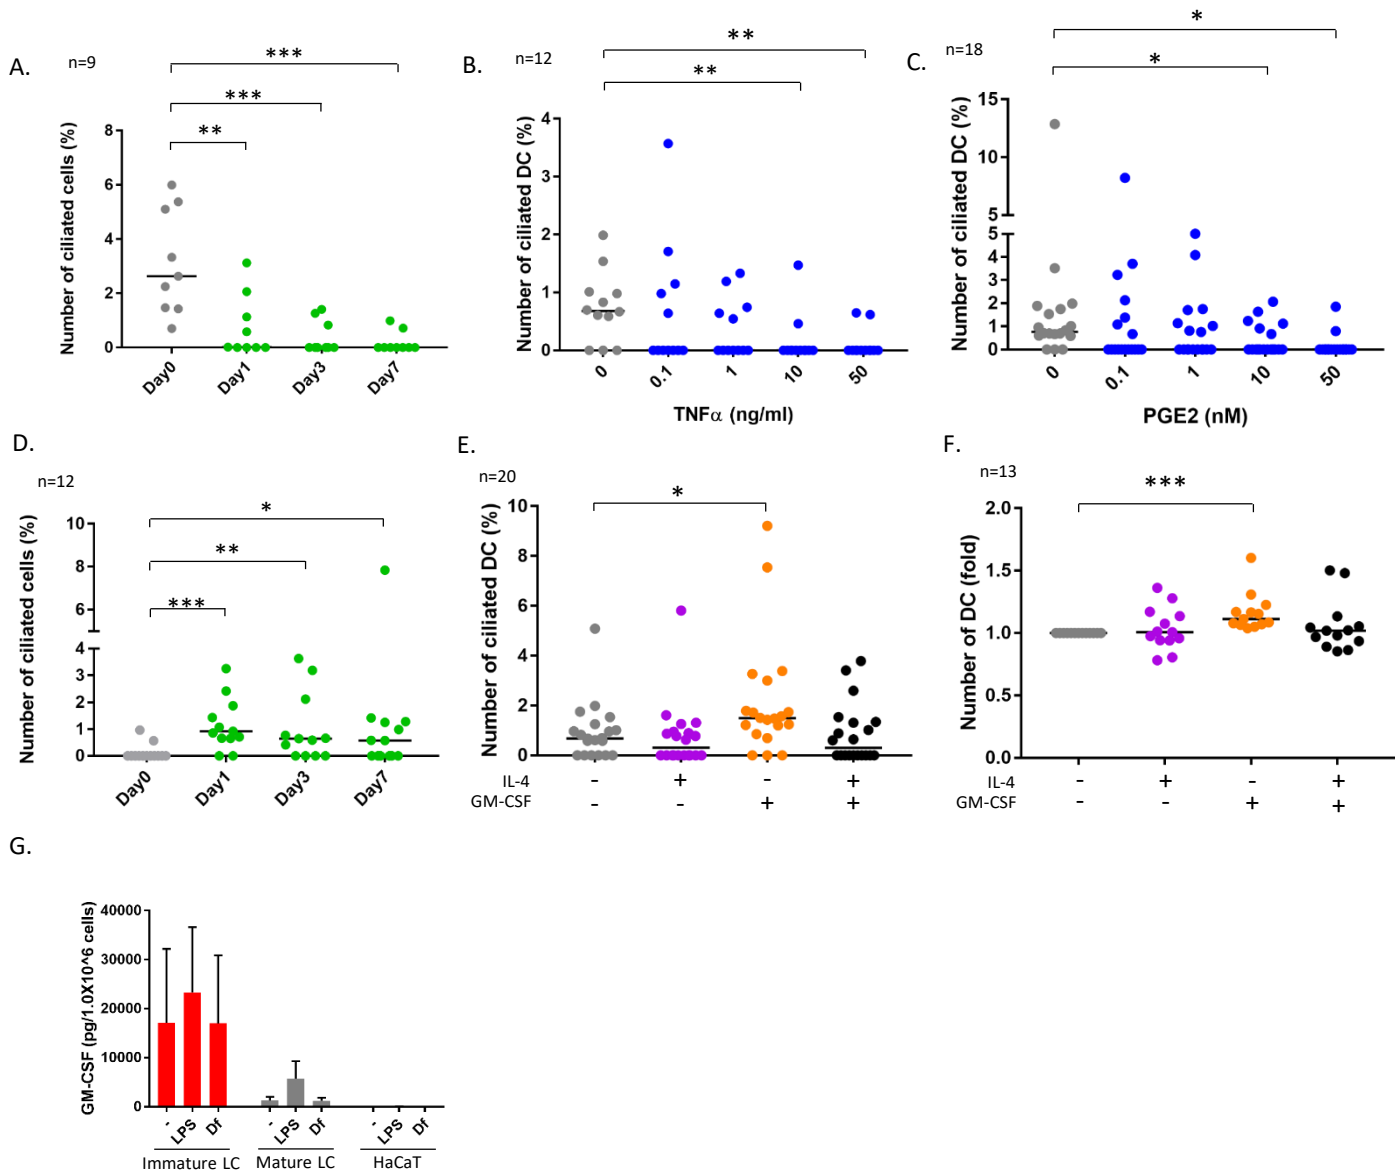

### Figure 2. DC maturation decreases primary cilia.

(A) CD14<sup>+</sup> monocytes were isolated from human PBMC by magnetic beads, then differentiated into DC by stimulating with 50 ng/ml GM-CSF, 50 ng/ml IL-4 and 50 ng/ml TNF $\alpha$ . Percentage of ciliated cell was shown in graph. Bar indicates median. \*\*P<0.01, \*\*\*P<0.001 (Mann-Whitney U test). n=9. (B, C) Human DC isolated from PBMC was stimulated with (B) TNF $\alpha$ , or (C) PGE2 for 24 hrs. Percentage of ciliated cells were shown in graph. Bar indicates median. \*P<0.05, \*\*P<0.01 (Mann-Whitney U test). n=12 and n=18, respectively. (D) CD14<sup>+</sup> monocytes were isolated from human PBMC by magnetic beads, then differentiated into DC with 50 ng/ml GM-CSF and 50 ng/ml IL-4. Percentage of ciliated cell was shown in graph. Bar indicates median. \*P<0.05, \*\*P<0.01, \*\*\*P<0.001. (Mann-Whitney U test). n=12. (E) DCs isolated from PBMC were cultured for 24hrs with 50 ng/ml IL-4 and 50 ng/ml GM-CSF. Percentage of ciliated cells was counted and graphed. Bar indicates median. \*P<0.05, (Fisher's LSD). n=20. (F) DCs isolated from PBMC were cultured with 50 ng/ml IL-4, 50 ng/ml GM-CSF with CCK buffer for 48 hrs, then relative number of cells were calculated by measuring absorbance. Bar indicates median. \*\*\*P<0.001 (Mann-Whitney U test). n=13. (G) Average of GM-CSF expression measured by ELISA. Immature LC, Mature LC and HaCaT cells were stimulated with 10  $\mu$ g/ml LPS or 10  $\mu$ g/ml Df for 24 hrs in media supplemented with 0.5% serum. Culture supernatant was used for assay. Error bar shows SEM. n=5.

### Figure 3. Primary cilia regulates proliferation and maturation via PDGFR $\alpha$ signaling.

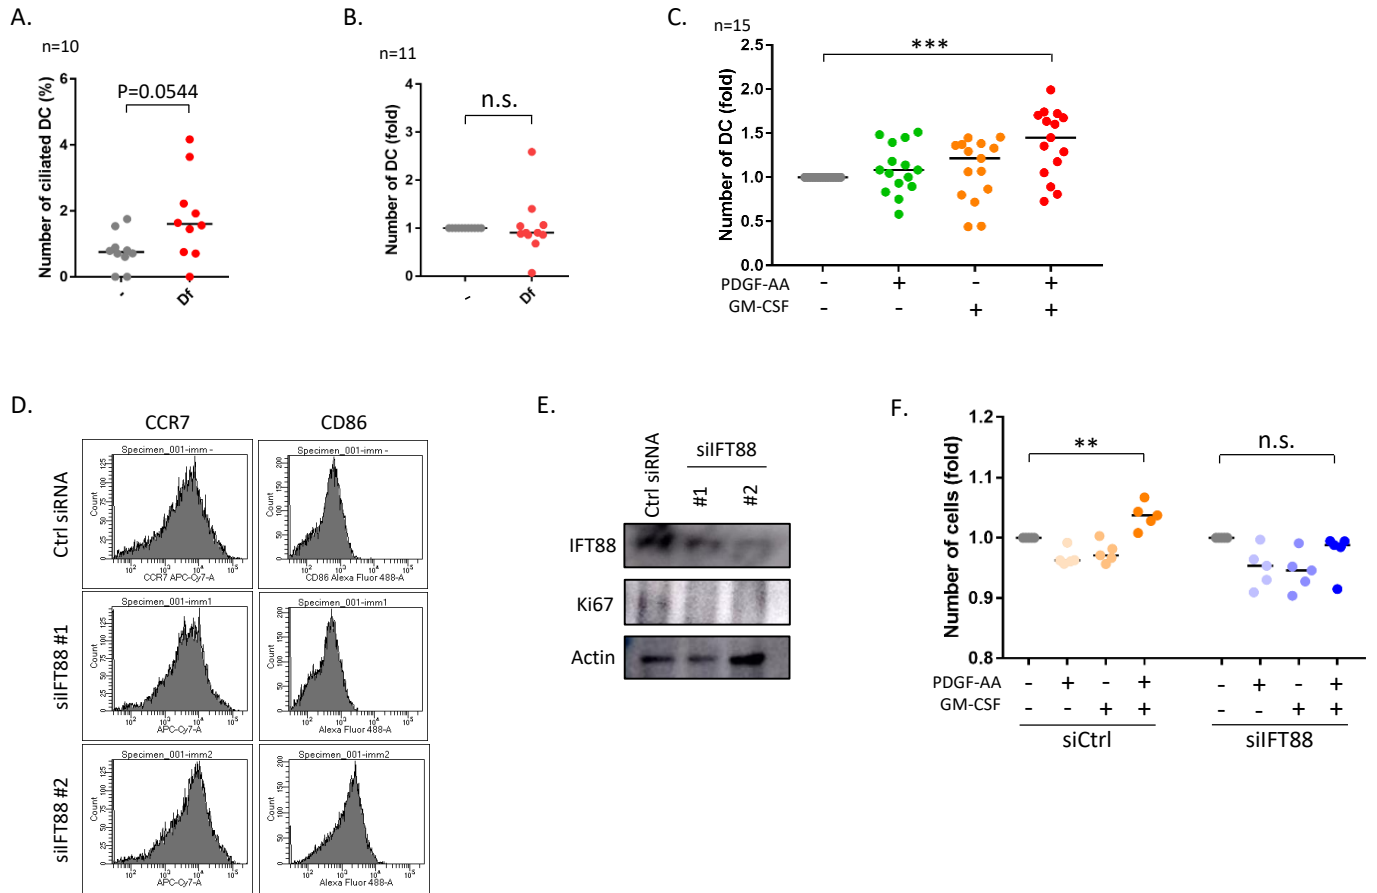

### Figure 3. Primary cilia regulates proliferation and maturation via PDGFR $\alpha$ signaling.

(A) DCs were cultured with 1  $\mu$ g/ml Df for 48 hrs, then counted ciliated cell number. Bar indicates median.  $^{**}P < 0.01$  (Mann-Whitney U test). (B) Relative number of DC was measured 48 hrs after stimulation with 1  $\mu$ g/ml Df by measuring absorbance. Bar indicates median.  $^{*}P < 0.05$  (Mann-Whitney U test). (C) Relative number of DC was measured 48 hrs after stimulation with 10 ng/ml PDGF-AA or 10 ng/ml GM-CSF. For the control of PDGF-AA stimulation, PDGF-AA solvent (4 mM HCl, 0.1% BSA) was added. Bar indicates median. Fisher's LSD was performed.  $^{***}P < 0.001$  n=15. (D) To induce immature DC, THP1 cells were cultured with 100 ng/ml GM-CSF and 100 ng/ml IL-4 for 5 days. At day5, cells were electroporated with 100 nM siRNA targeting IFT88 or control siRNA. Two days after electroporation, expression of cell marker was measured by flow cytometry. (E) IFT88 and Ki67 expression in THP1-derived immature DC was investigated by western blotting. (F) Immature DC derived from THP1 was electroporated with 100 nM siRNA. Two days after electroporation, cells were stimulated with 10 ng/ml PDGF-AA or 10 ng/ml GM-CSF for 48 hours. Proliferation activity was measured by measuring absorbance with adding CCK buffer. Cells were Bar indicates median.  $^{**}P < 0.01$  (Student T test).

**Figure 4. Primary cilia are increased in atopic dermatitis.**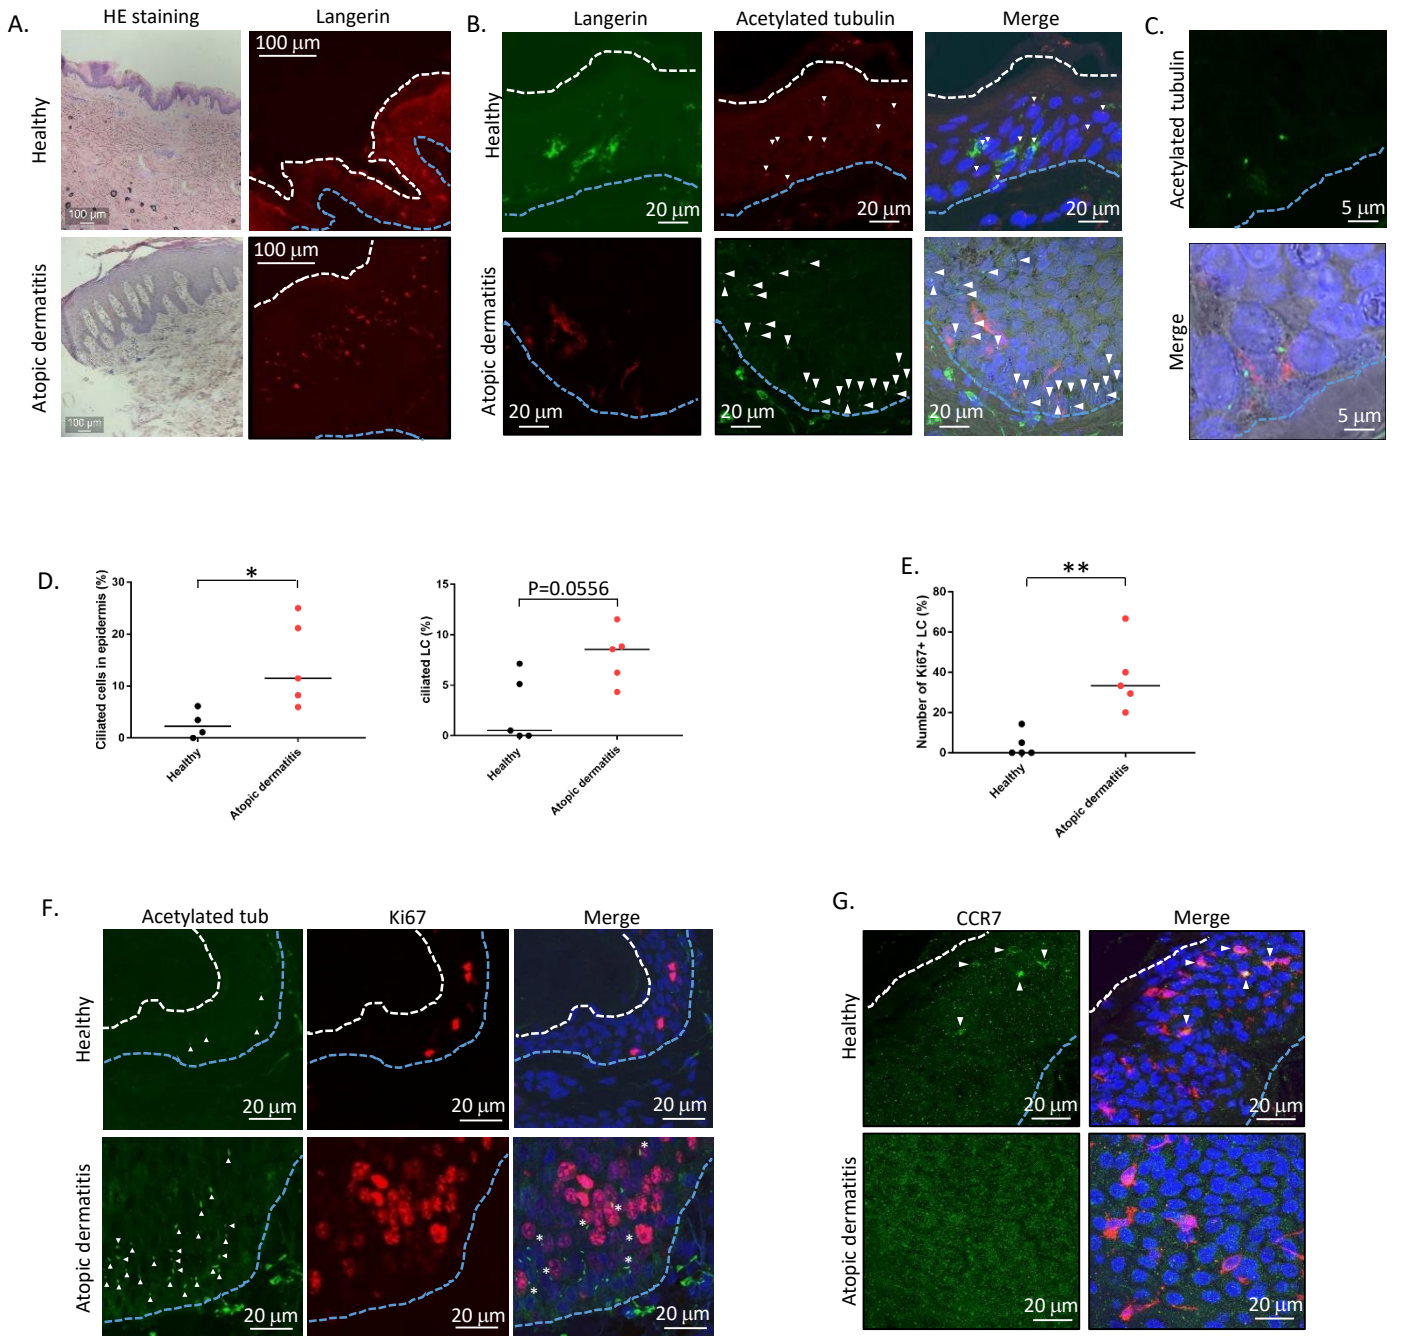**Figure 4. Primary cilia are increased in atopic dermatitis.**

(A) HE staining of human skin and Immunostaining of langerin in epidermis. Blue dot line shows basal layer. White dot line shows stratum corneum. (B) Langerin and acetylated tubulin staining in human epidermis. Blue dot line shows basal layer. Arrowhead indicates primary cilia-like structure. (C) Magnified image of ciliated LC in atopic skin. Langerin is shown in red. (D) Percentage of ciliated epidermal cells (upper), and ciliated LC (lower) in healthy or atopic dermatitis epidermis. Healthy samples; n=4 or n=5, atopic skin sample; n=5. Bar indicates median. \* $P < 0.05$  (Mann-Whitney U test). (E) ki67-positive LC in healthy and atopic skin were counted and graphed. \* $P < 0.05$  (Mann-Whitney U test). (F) Immunostaining for acetylated tubulin (green), and ki67 (red) in epidermis from healthy donor or atopic dermatitis patient. Blue dot line shows basal layer. White dot line shows stratum corneum. Arrow head shows primary cilia. Asterisk shows ki67-positive ciliated cells. (G) Immunostaining for CCR7 (green), and langerin (red) in epidermis. Arrow head indicates CCR7 positive LC



**Figure 5. Keratinocyte differentiation marker, Loricrin expression correlates with primary cilia rate**

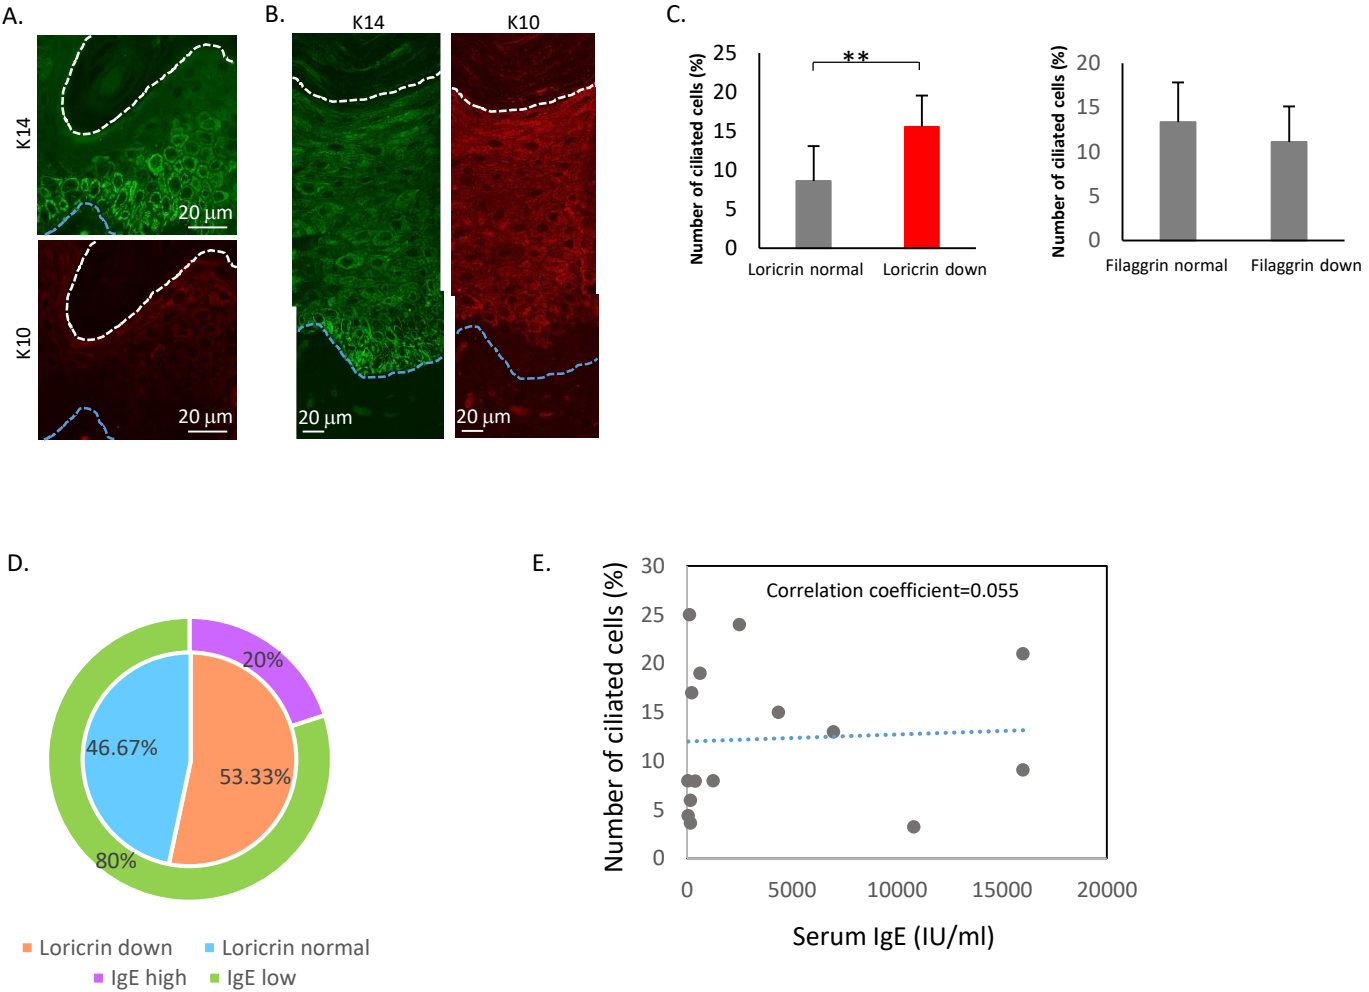

**Figure 5. Keratinocyte differentiation marker, Loricrin expression correlates with primary cilia rate**  
 (A,B) Immunostaining for K14 (green) and K10 (red) in (A) healthy epidermis, and in (B) atopic epidermis. (C) Correlation between primary cilia and epidermal barrier Protein, loricrin and Filaggrin. Atopic dermatitis epidermis were immunostained with Loricrin or Filaggrin, with acetylated tubulin, then calculated percentage of ciliated cells. (D) Percentage of atopic dermatitis patients showing Loricrin normal, loricrin down, IgE low, IgE high, respectively. (E) Correlation between primary cilia percentage and serum IgE level in atopic dermatitis patients.
